# Supplementary material for: Vitamin E Blocks Connexin Hemichannels and Prevents Deleterious Effects of Glucocorticoid Treatment on Skeletal Muscles
Source: Int J Mol Sci. 2020 Jun 8;21(11):4094. doi: 10.3390/ijms21114094 (PMC7312599; doi:10.3390/ijms21114094)
Supplement: Supplementary file 1 [file ijms-21-04094-s001.pdf]

Supplementary material

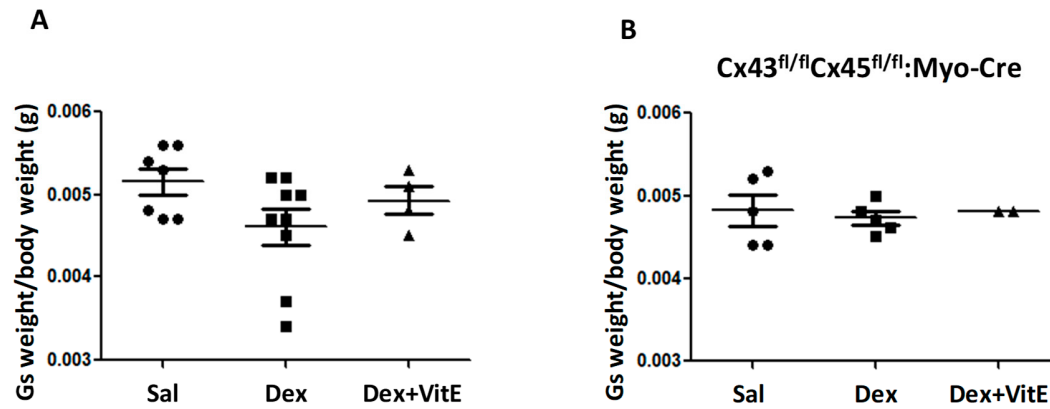

**Supplementary Figure 1: Muscle weight of wild type but not Cx43/Cx45 expression deficient mice is reduced by dexamethasone.** Wild type and Cx43<sup>fl/fl</sup>Cx45<sup>fl/fl</sup>:Myo-Cre mice were treated daily during 7 days with saline (Sal) or dexamethasone (10 mg/kg Dex) or Dex 10 mg/day and fed with Vitamin E supplemented diet (Dex + VitE). At the end of the experiment mice were euthanized and body and gastrocnemius (Gs) weight was recorded. **(A)** Gs weight per body weight ratio from wild type mice. Saline = Sal; Dexamethasone = Dex; vitamin E; VitE (n sal=7; Dex=9; Dex+VitE=4). **(B)** Gs weight per body weight ratio from Cx43<sup>fl/fl</sup>Cx45<sup>fl/fl</sup>:Myo-Cre mice deficient in expression of Cx43 and Cx45 specifically in myofibers. (n sal=5; Dex=5; Dex+VitE=2).

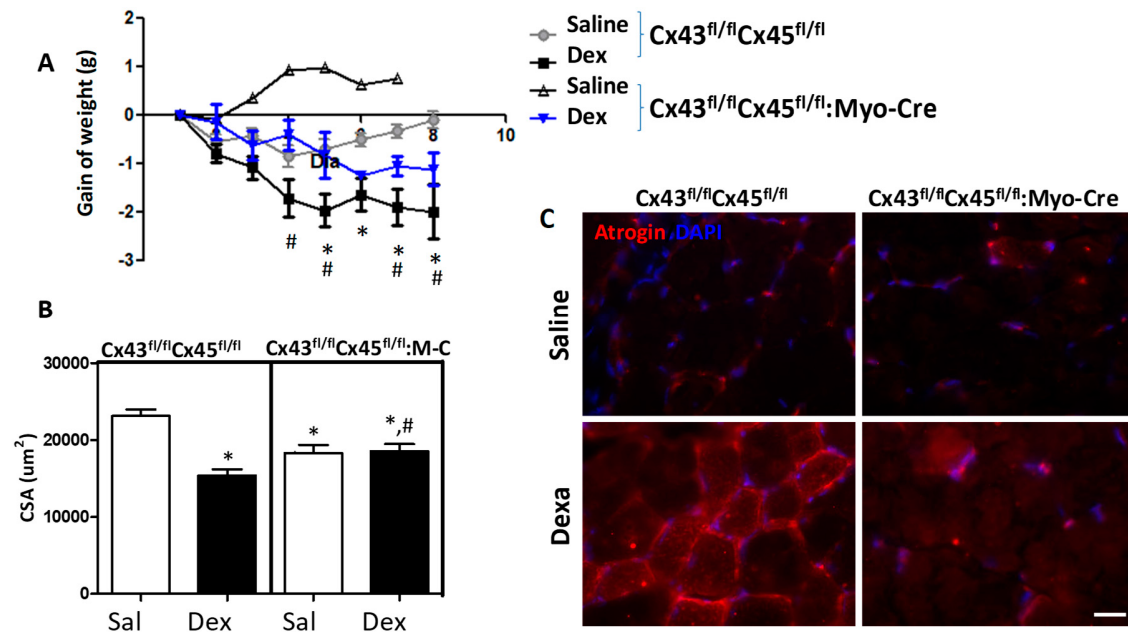

**Supplementary Figure 2: Cx43/Cx45 expression deficient mice are resistant to weight loss and muscle atrophy induced by dexamethasone.** Cx43<sup>fl/fl</sup>Cx45<sup>fl/fl</sup> and Cx43<sup>fl/fl</sup>Cx45<sup>fl/fl</sup>:Myo-Cre mice were daily treated for 7 days with saline (Sal) or dexamethasone (Dex, 10 mg/kg Dex). **(A)** The mice weight was recorded daily. The graph shows the loss of weight relative to the start of treatment. (For Cx43<sup>fl/fl</sup>Cx45<sup>fl/fl</sup> n Saline: 5; n Dex: 6 and for Cx43<sup>fl/fl</sup>Cx45<sup>fl/fl</sup>:Myo-Cre n Saline: 6; n Dex: 9 ). Significance was assessed by two-way ANOVA followed by Bonferroni post hoc test. \* p<0.05 for Saline vs Dex Cx43<sup>fl/fl</sup>Cx45<sup>fl/fl</sup> mice; # p<0.05 Saline Cx43<sup>fl/fl</sup>Cx45<sup>fl/fl</sup> vs Dex Cx43<sup>fl/fl</sup>Cx45<sup>fl/fl</sup>:Myo-Cre **(B)** The cross-sectional area (CSA) of myofibers of tibialis anterior muscles was measured by off-line analysis of hematoxylin-eosin images. Five images of each muscle section were evaluated (n=3 for all groups).. The results are expressed as mean ± SEM. \* p<0.05 different from saline Cx43<sup>fl/fl</sup>Cx45<sup>fl/fl</sup> mice; # p<0.05 different from Dex Cx43<sup>fl/fl</sup>Cx45<sup>fl/fl</sup> mice **(C)** The presence and cellular distribution of the protein-degradation marker Atrogin-1 (Red) was evaluated by immunofluorescence assay in cross sections of TA muscles. (n=3 for all groups). Scale bar: 50 μm.
